# Supplementary material for: In vivo analysis of outer arm dynein transport reveals cargo-specific intraflagellar transport properties
Source: PubMed Central journal article supplement — Mol Biol Cell. 2018 Oct 15;29(21):2553–65. doi: 10.1091/mbc.E18-05-0291 (PMC6254574; doi:10.1091/mbc.e18-05-0291), 2018-10-15

# Supplemental Materials

*Molecular Biology of the Cell*

Dai et al.

## Supplementary figures

*Fig. S1) Behavior of IC2-NG in oda3 flagella*

A) Kymograms from two-color imaging of IC2-NG and IFT20-mC in the *oda3 oda6 ift20* background. Shown are the single kymograms, the merged kymogram, and the IFT20-mC kymogram with a tracing of the IC2-NG trajectories.

B) Kymograms showing the behavior of IC2-NG at the flagellar tip. Typically, IC2-NG paused only briefly at the flagella tip.

C) Kymograms showing the presence of two IC2-NG particles on the same IFT train.

Bars (A-C) = 2 $\mu$ m and 2s; arrowheads, anterograde IFT; arrows, retrograde IFT;

asterisks, stationary phases.

*Fig. S2) Intact ODAs have a low diffusional mobility*

A) Compilation of kymograms comparing diffusion of tagged PLD (PLD-NG), end binding protein 1 (EB1-NG), the radial spoke subunits RSP4 (RSP4-sfGFP) and IC2 (IC2-NG). PLD-NG is a lipidated membrane-anchored protein predicted to be ~50 kD (including the NG), EB1-NG is predicted to form a dimer of ~100 kDa, RSP4-sfGFP is part of a 12S transport complex approximately corresponding to ~400 kD, and IC2-NG is part of the 20S ~2 MD ODAs. The dashed red line serves as a fiduciary mark to facilitate comparison of the lateral displacement of IC2-NG particles.

B) Comparison of IC2-NG diffusion in the *oda* mutants *soda2*, *oda3*, *oda8* and *oda16*. The diffusional mobility of IC2-NG in *oda8* was variable; the mobility of the fast diffusing particles ranked below those observed in *oda2* but above those in control and *oda3*. Occasionally, very fast diffusing particles (arrowheads) were observed in both wild-type and the mutants; examples are shown in *oda3* and *oda16*. The high mobility of these particles suggests that they are smaller than those in *oda2* and probably represent IC2-NG alone or IC2-NG fragments. In panel A, the IC2-NG Kymograms are based on recordings at 5 fps, all other kymograms are based on 10 fps recordings. Arrowheads, IFT; arrows, very fast diffusion; asterisk, stationary IC2-NG. Bars = 2 $\mu$ m and 2s (for all panels).

*Fig. S3) Analysis of IC2-NG in the transport mutants oda16 and ift46 IFT46ΔN*

A, B) TIRF, BF and merged images of IC2-NG in *oda16oda6* mutants with full-length (A) and regenerating (B) flagella. Note that the distribution of IC2-NG in regenerating *oda16 oda6* IC2-NG flagella resembles that of *oda6* IC2-NG *ift46IFT46ΔN* flagella and *oda3* flagella during early rescue. Bar = 2 μm.

C) TIRF images of *ift46IFT46ΔNoda6* IC2-NG cells. Bar = 2 μm.

D) TIRF images of *oda16 ift46IFT46ΔNoda6* IC2-NG cells. Bar = 2 μm.

E) Western blot of flagella isolated from the strains indicated. For the IC2-NG quantification, the anti-IC2 signals were corrected for the anti-IFT81 signals. The faster migrating anti-IC2 positive band in the *oda6* IC2-NG flagella did not react with anti-NG.

F) Analysis of the presence and type of IC2-NG accumulation near the basal bodies in various strains. n, number of cells analyzed.

*Fig. S4) Behavior of IC2-NG in oda mutants*

Compilation of kymograms showing the behavior of IC2-NG in wild-type (*oda6* IC2-NG) and *odamutant* flagella. Kymograms of *oda6* IC2-NG, *oda6*, *oda3*, *oda8*, and *oda10* were acquired from zygotes. The flagella of *oda6* x *oda6* IC2-NG zygotes were photobleached prior to document IC2-NG behavior in *oda6* IC2-NG-derived and in *oda6*-derived flagella. Kymograms of *oda2* and *oda16* were acquired from vegetative cells. Most of the kymograms are identical with the ones shown in the main figures. Bars = 2 μm and 2 s.

## Supplementary videos

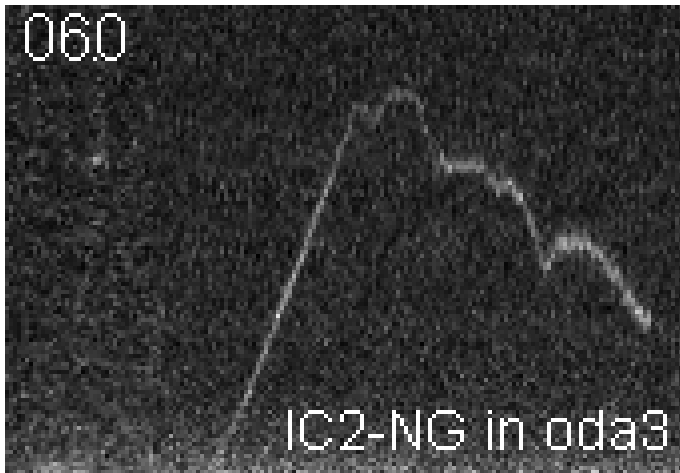

*Video S1) IFT of IC2-NG in oda3 flagella*

TIRF video and kymogram showing IFT transport and diffusion of IC2-NG in *oda3* flagella. Images were acquired at 10 fps and the timer counts seconds. The movie corresponds to Fig. 2A.

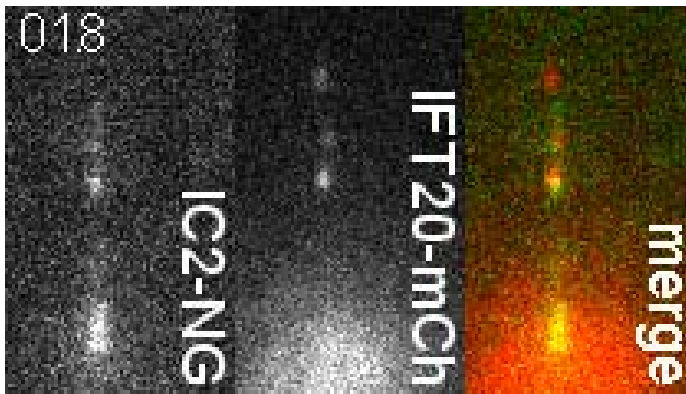

*Video S2) IC2-NG co-migrates with IFT20-mC*

Two-color TIRF video showing IC2-NG and IFT20-mC in the corresponding *oda6 ift20-I* double mutant background. Images were acquired at 10 fps and timer counts seconds.

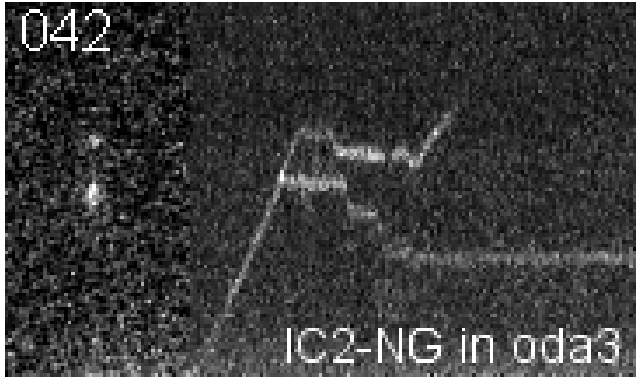

*Video S3) IFT trains carrying two IC2-NG particles*

TIRF video and kymogram showing transport and unloading of IC2-NG from IFT. One of the two particles was photobleached during the recording. Images were acquired at 10 fps and the timer counts seconds. The movie corresponds to Fig. S3 C.

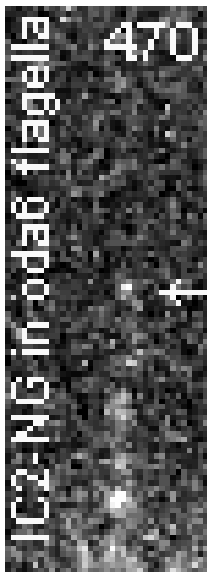

*Video S4) Docking of IC2-NG particles in oda6 flagella*

TIRF video showing transport, unloading and rapid immobilization of IC2-NG in an *oda6*-derived flagellum of an *oda6* x *oda6* IC2-NG zygote. The arrows mark the

positions of the immobilized IC2-NG particles. Images were acquired at 10 fps and the timer counts seconds. The movie corresponds to Fig. 3C top panel.

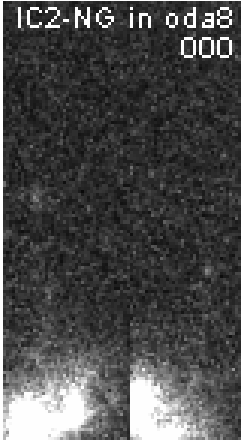

*Video S5) Diffusion and IFT of IC2-NG in zygotic oda8 flagella.*

TIRF video showing IC2-NG in two flagella of an *oda8 oda6 x oda8 oda6* IC2-NG zygote. Note long-lasting diffusion of IC2-NG particles compared to Video S6 showing zygotic *oda3* flagella. Images were acquired at 10 fps and the timer counts ss:mm. The movie corresponds to Fig. 5B.

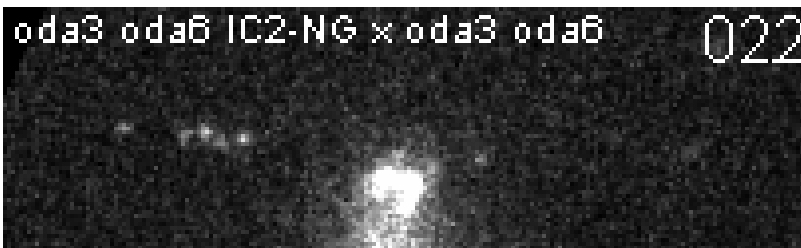

*Video S6) Transport of IC2-NG in flagella of an oda3 oda6 x oda3 oda6 IC2-NG zygote.*

TIRF video showing IC2-NG behavior in the absence of the DC. Note particles cycling between IFT, diffusion, and transient docking. Images were acquired at 10 fps and the timer counts seconds. A corresponding kymogram is shown in Fig. S3B top row, right.

# Figure S1 (1 column)

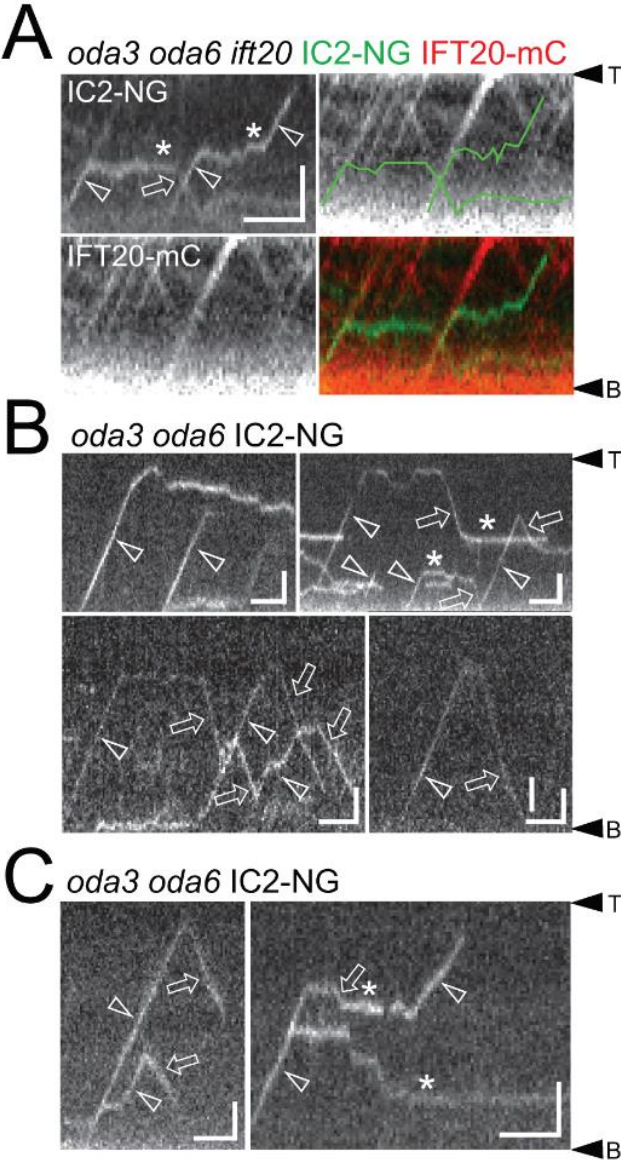



Figure S2 (2 columns)

A

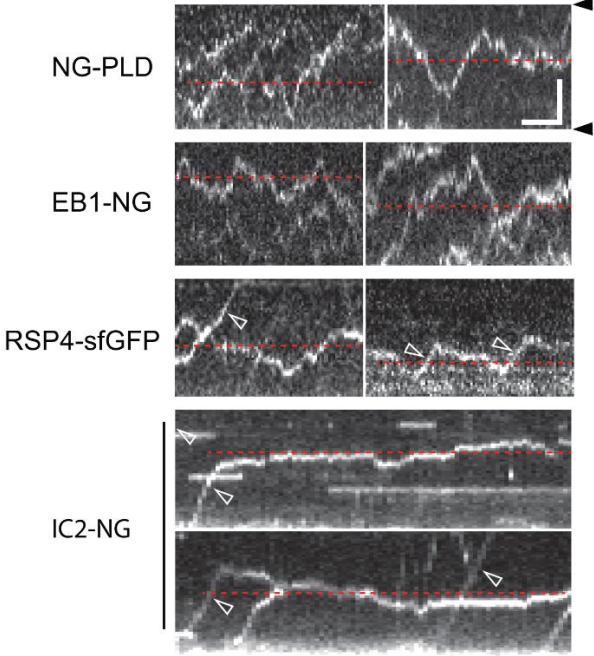

B

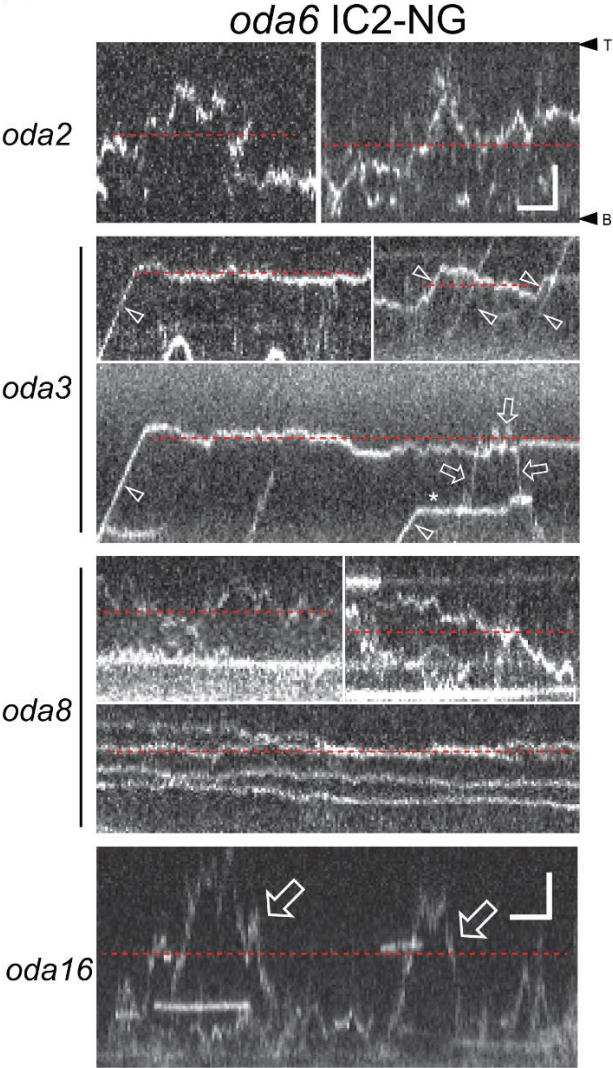

# Figure S3 (2 columns)

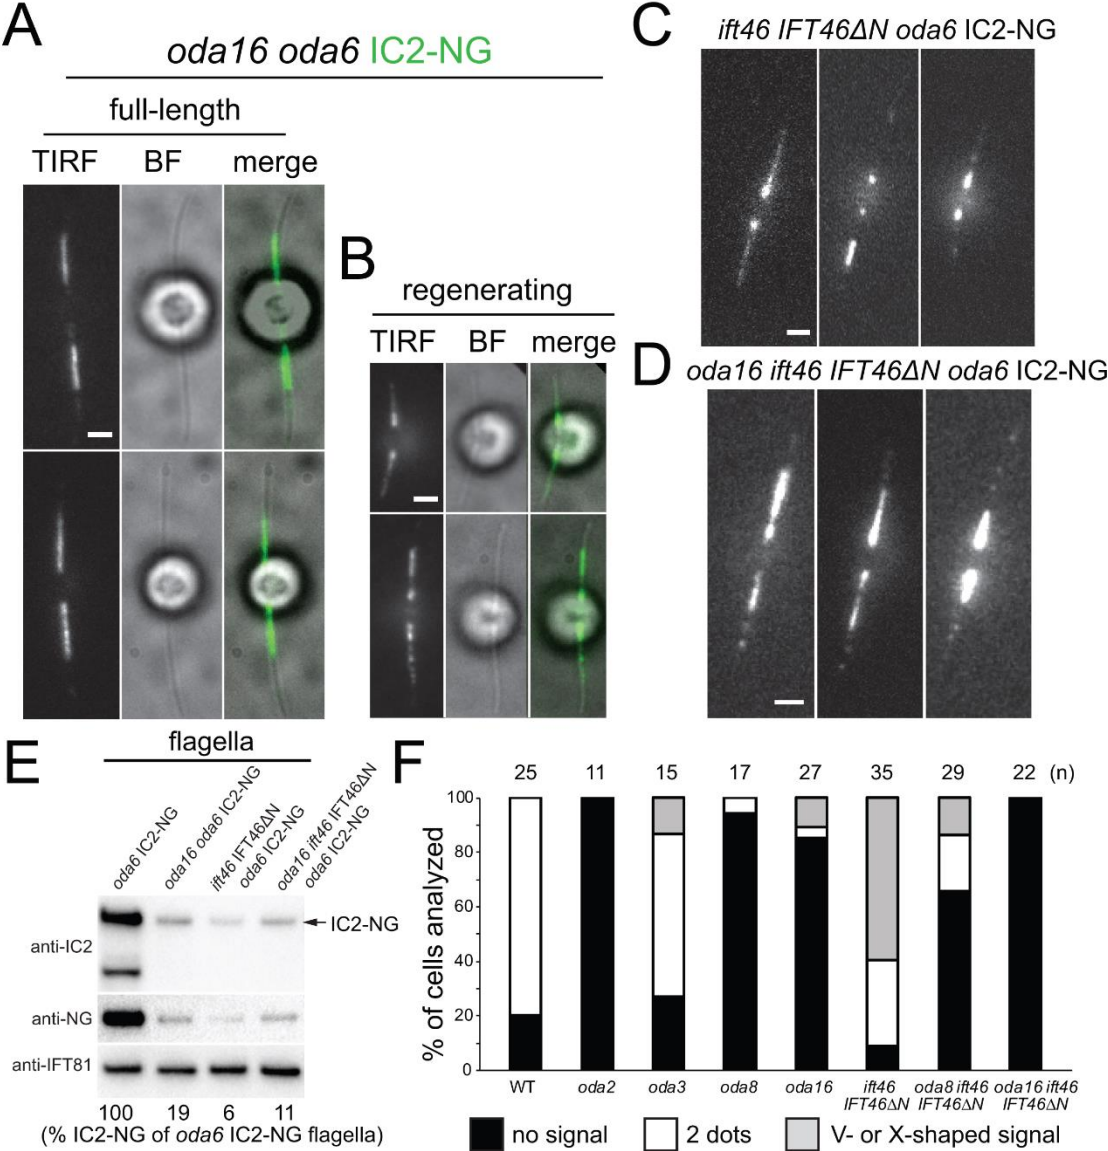

# Figure S4 (1 column)

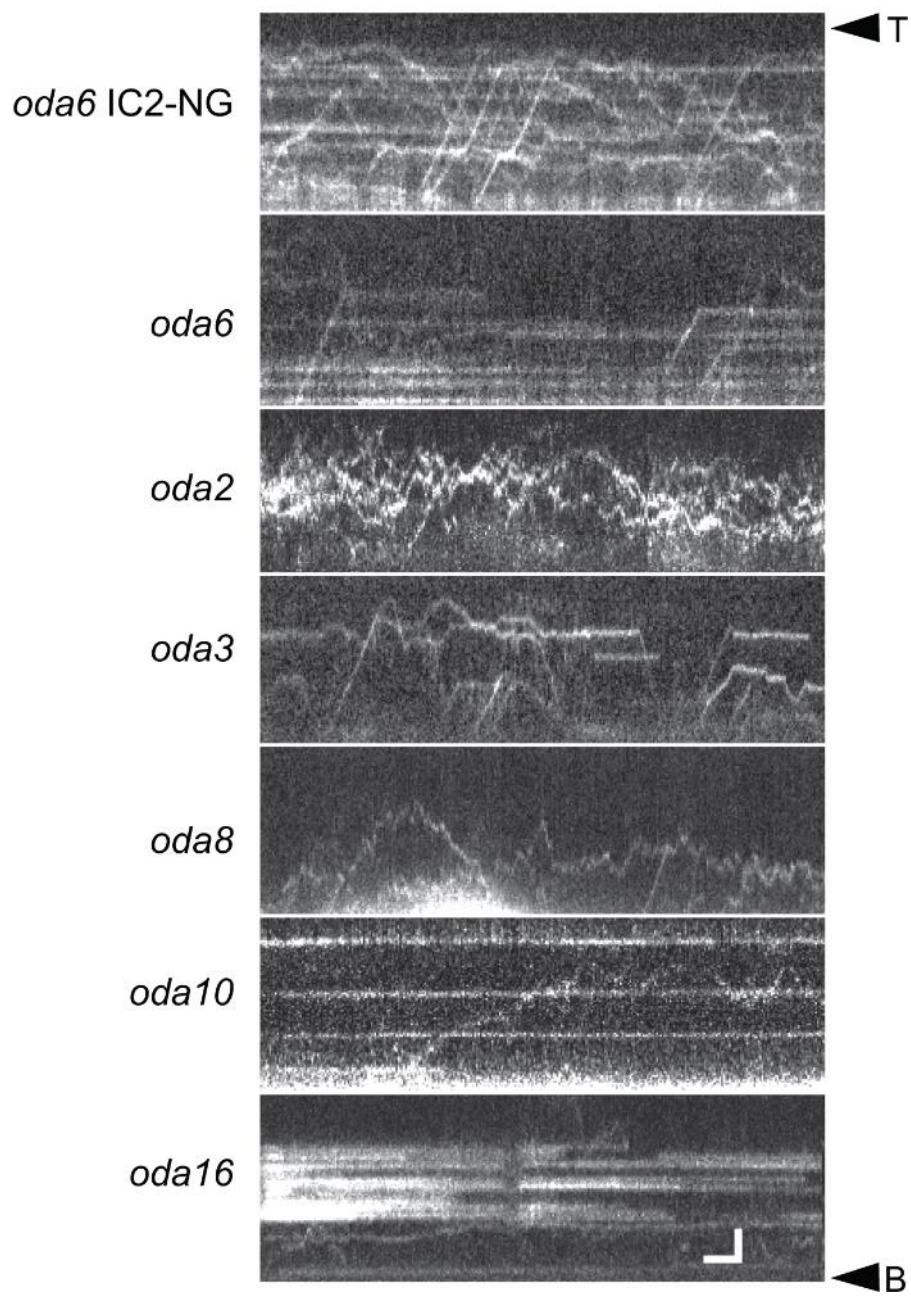

Supplement: mbc-29-2553-s001.pdf [file mbc-29-2553-s001.pdf]
